# Supplementary material for: Transcriptomic Responses of a Lightly Calcified Echinoderm to Experimental Seawater Acidification and Warming during Early Development
Source: MDPI journal article supplement (doi:10.3390/biology12121520), 2023-12-13
Supplement: s1 [file s1]

**Table S1. Primers used in the study**

| Gene                                 | Annealing temperature | Primer sequence       |                      |
|--------------------------------------|-----------------------|-----------------------|----------------------|
|                                      |                       | Sense 5'-3'           | Antisense 5'-3'      |
| <i>cytochrome P450 2J6</i>           | 55°C                  | CTTGAACGATTGCAGGAGGG  | GTTGGATACCTTTCGCGTCC |
| <i>G-protein signaling modulator</i> | 56°C                  | TTGAGATGCTAATGCGATGC  | TCGGTTCTCTGCTCTTCGAT |
| <i>collagen</i>                      | 61°C                  | CAGGTGTCCAGGGACCTAAA  | AGCGCCAGTAACTCCAGTGT |
| <i>heat shock protein 90</i>         | 61°C                  | CCAGTTTGGTGTGGCTTTT   | CTGGCTGTGTTTCTTGACGA |
| <i>NADH dehydrogenase</i>            | 55°C                  | CTCGTAATCGCCGTTATGGT  | TATCCATTGGGTGGGAAGAA |
| <i>Bone morphogenetic protein 2</i>  | 61°C                  | CGTCGTGACAAAAGGGAAAT  | TGTAATAAGCGCGTGAGTCG |
| <i>Tgif</i>                          | 55°C                  | GCTCGCTCTCAAAAGGACAAG | GACACCATCACCACCAGCA  |
| <i>Wnt 8</i>                         | 55°C                  | CAGATGAACAGCAAACCACCA | GGGAGCGGTGCGATAGTAAG |

**Table S2. Summary of transcriptomic sequencing data**

| Stage    | Treatment | Sample | Raw Data   | Clean Data | Valid Ratio (%) | Mapped Reads | Mapped Ratio (%) | Q20(%) | Q30 (%) | GC Content% |
|----------|-----------|--------|------------|------------|-----------------|--------------|------------------|--------|---------|-------------|
| Blastula | CON       | B1_A1  | 68,216,408 | 66,865,914 | 98.02           | 49,920,118   | 74.66            | 98.36  | 94.9    | 39.53       |
|          |           | B1_A2  | 58,354,486 | 57,307,170 | 98.21           | 42,904,656   | 74.87            | 98.32  | 94.79   | 40.11       |
|          |           | B1_A3  | 51,733,248 | 50,730,226 | 98.06           | 38,178,462   | 75.26            | 98.38  | 94.95   | 40.15       |
|          | OA        | B1_C1  | 53,997,880 | 53,028,028 | 98.20           | 40,221,494   | 75.85            | 98.42  | 94.88   | 38.84       |
|          |           | B1_C2  | 53,959,424 | 52,989,766 | 98.20           | 40,966,230   | 77.31            | 98.49  | 95.2    | 40.76       |
|          |           | B1_C3  | 56,311,882 | 55,194,104 | 98.02           | 42,760,568   | 77.47            | 98.51  | 95.25   | 41.05       |
|          | OW        | B1_B1  | 54,658,734 | 53,679,476 | 98.21           | 40,589,590   | 75.61            | 98.38  | 94.88   | 39.66       |
|          |           | B1_B2  | 68,785,244 | 65,708,830 | 95.53           | 49,094,930   | 74.72            | 98.39  | 94.92   | 38.81       |
|          |           | B1_B3  | 55,752,068 | 53,694,044 | 96.31           | 41,377,084   | 77.06            | 98.48  | 95.18   | 41.05       |
|          | OAW       | B1_D1  | 63,280,640 | 62,142,800 | 98.20           | 47,733,902   | 76.81            | 98.44  | 95.04   | 40.76       |
|          |           | B1_D2  | 59,186,792 | 58,150,330 | 98.25           | 44,108,498   | 75.85            | 98.44  | 95.07   | 39.93       |
|          |           | B1_D3  | 58,147,718 | 56,903,742 | 97.86           | 44,139,780   | 77.57            | 98.52  | 95.31   | 41.09       |
| Gastrula | CON       | G2_A1  | 55,324,616 | 53,230,134 | 96.21           | 40,640,070   | 76.35            | 98.41  | 95.01   | 39.56       |
|          |           | G2_A2  | 57,838,010 | 56,516,334 | 97.71           | 44,164,930   | 78.15            | 98.44  | 95.06   | 41.53       |
|          |           | G2_A3  | 54,855,936 | 53,857,586 | 98.18           | 41,054,650   | 76.23            | 98.28  | 94.66   | 39.99       |
|          | OA        | G2_C1  | 54,816,816 | 53,437,148 | 97.48           | 41,824,920   | 78.27            | 98.49  | 95.22   | 41.08       |
|          |           | G2_C2  | 65,259,354 | 63,123,980 | 96.73           | 50,690,016   | 80.30            | 98.64  | 95.63   | 43.42       |
|          |           | G2_C3  | 54,822,384 | 54,029,356 | 98.55           | 42,022,200   | 77.78            | 98.44  | 95.09   | 41.62       |
|          | OW        | G2_B1  | 59,578,780 | 58,416,556 | 98.05           | 45,064,050   | 77.14            | 98.42  | 95      | 41.01       |
|          |           | G2_B2  | 50,672,768 | 49,653,458 | 97.99           | 38,397,464   | 77.33            | 98.36  | 94.86   | 40.8        |
|          |           | G2_B3  | 53,466,492 | 52632,858  | 98.44           | 40,618,396   | 77.17            | 98.42  | 95.01   | 40.9        |

|                    |     |       |            |            |       |            |       |       |       |       |
|--------------------|-----|-------|------------|------------|-------|------------|-------|-------|-------|-------|
| <b>Auricularia</b> | OAW | G2_D1 | 54,918,784 | 53,653,396 | 97.70 | 42,350,944 | 78.93 | 98.55 | 95.35 | 42.56 |
|                    |     | G2_D2 | 58,047,184 | 57,100,486 | 98.37 | 44,169,230 | 77.35 | 98.47 | 95.15 | 41.38 |
|                    |     | G2_D3 | 64,108,428 | 63,138,568 | 98.49 | 48,807,650 | 77.30 | 98.5  | 95.21 | 41.29 |
|                    | CON | A3_A1 | 49,143,600 | 48,287,936 | 98.26 | 36,397,308 | 75.38 | 98.46 | 95.16 | 40.08 |
|                    |     | A3_A2 | 66,288,238 | 65,036,376 | 98.11 | 48,918,260 | 75.22 | 98.46 | 95.15 | 40.68 |
|                    |     | A3_A3 | 46,878,742 | 46,045,986 | 98.22 | 34,204,830 | 74.28 | 98.41 | 95    | 39.23 |
|                    | OA  | A3_C1 | 51,203,618 | 49,528,940 | 96.73 | 38,947,808 | 78.64 | 98.53 | 95.3  | 42.14 |
|                    |     | A3_C2 | 62,329,326 | 60,513,956 | 97.09 | 46,990,706 | 77.65 | 98.4  | 95.03 | 40.86 |
|                    |     | A3_C3 | 42,798,728 | 41,464,062 | 96.88 | 31,550,048 | 76.09 | 98.25 | 94.64 | 39.27 |
|                    | OW  | A3_B1 | 63,549,768 | 62,062,396 | 97.66 | 46,846,594 | 75.48 | 98.37 | 94.9  | 40.26 |
|                    |     | A3_B2 | 52,039,874 | 51,068,308 | 98.13 | 38,125,134 | 74.66 | 97.89 | 93.59 | 39.77 |
|                    |     | A3_B3 | 57,143,634 | 56,277,324 | 98.48 | 42,446,326 | 75.42 | 98.41 | 95.01 | 39.96 |
|                    | OAW | A3_D1 | 58,644,454 | 57,518,446 | 98.08 | 43,498,160 | 75.62 | 98.38 | 94.93 | 39.21 |
|                    |     | A3_D2 | 41,837,242 | 40,906,436 | 97.78 | 30,554,620 | 74.69 | 98.16 | 94.3  | 38.33 |
|                    |     | A3_D3 | 58,978,404 | 57,877,840 | 98.13 | 44,458,532 | 76.81 | 98.4  | 95.04 | 40.84 |
|                    | CON | D4_A1 | 54,767,706 | 53,810,376 | 98.25 | 41,562,576 | 77.24 | 98.47 | 95.22 | 41.13 |
|                    |     | D4_A2 | 68,970,942 | 67,613,596 | 98.03 | 52,447,866 | 77.57 | 98.39 | 95.05 | 41.29 |
|                    |     | D4_A3 | 53,647,426 | 52,462,220 | 97.79 | 41,390,438 | 78.90 | 98.42 | 95.04 | 43.27 |
|                    | OA  | D4_C1 | 43,742,834 | 42,258,498 | 96.61 | 32,279,970 | 76.39 | 98.41 | 95.08 | 40.06 |
|                    |     | D4_C2 | 54,092,350 | 52,968,858 | 97.92 | 40,936,416 | 77.28 | 98.46 | 95.12 | 40.86 |
|                    |     | D4_C3 | 47,738,822 | 46,711,608 | 97.85 | 36,631,158 | 78.42 | 98.67 | 95.7  | 42.61 |
|                    | OW  | D4_B1 | 57,414,410 | 55,729,266 | 97.06 | 41,640,154 | 74.72 | 98.37 | 95.1  | 40.43 |
|                    |     | D4_B2 | 57476240   | 55,969,908 | 97.38 | 42,419,064 | 75.79 | 98.39 | 95.03 | 41.03 |
|                    |     | D4_B3 | 76820576   | 75,105,010 | 97.77 | 57,219,522 | 76.19 | 98.33 | 94.91 | 40    |
|                    | OAW | D4_D4 | 65,533,786 | 64,319,512 | 98.15 | 49,804,042 | 77.43 | 98.4  | 94.94 | 42.1  |

|       |            |            |       |            |       |       |       |       |
|-------|------------|------------|-------|------------|-------|-------|-------|-------|
| D4_D2 | 57,393,394 | 56,336,964 | 98.16 | 44,097,202 | 78.27 | 98.42 | 94.95 | 42.02 |
| D4_D3 | 53,069,730 | 52,187,932 | 98.34 | 40,384,348 | 77.38 | 98.47 | 95.17 | 41.36 |

Note: Q20, base sequencing error probability <1%; Q30, base sequencing error probability <0.1%. CON: 19°C, 400 µatm; OA: 19°C, 1000 µatm; OW: 22°C, 400 µatm; OWA: 22°C, 1000 µatm.
