# Supplementary material for: Transcriptomic Responses of a Lightly Calcified Echinoderm to Experimental Seawater Acidification and Warming during Early Development
Source: MDPI journal article supplement (doi:10.3390/biology12121520), 2023-12-13
Supplement: s1 [file s1]

## blastula

OW vs. CON

OA vs. CON

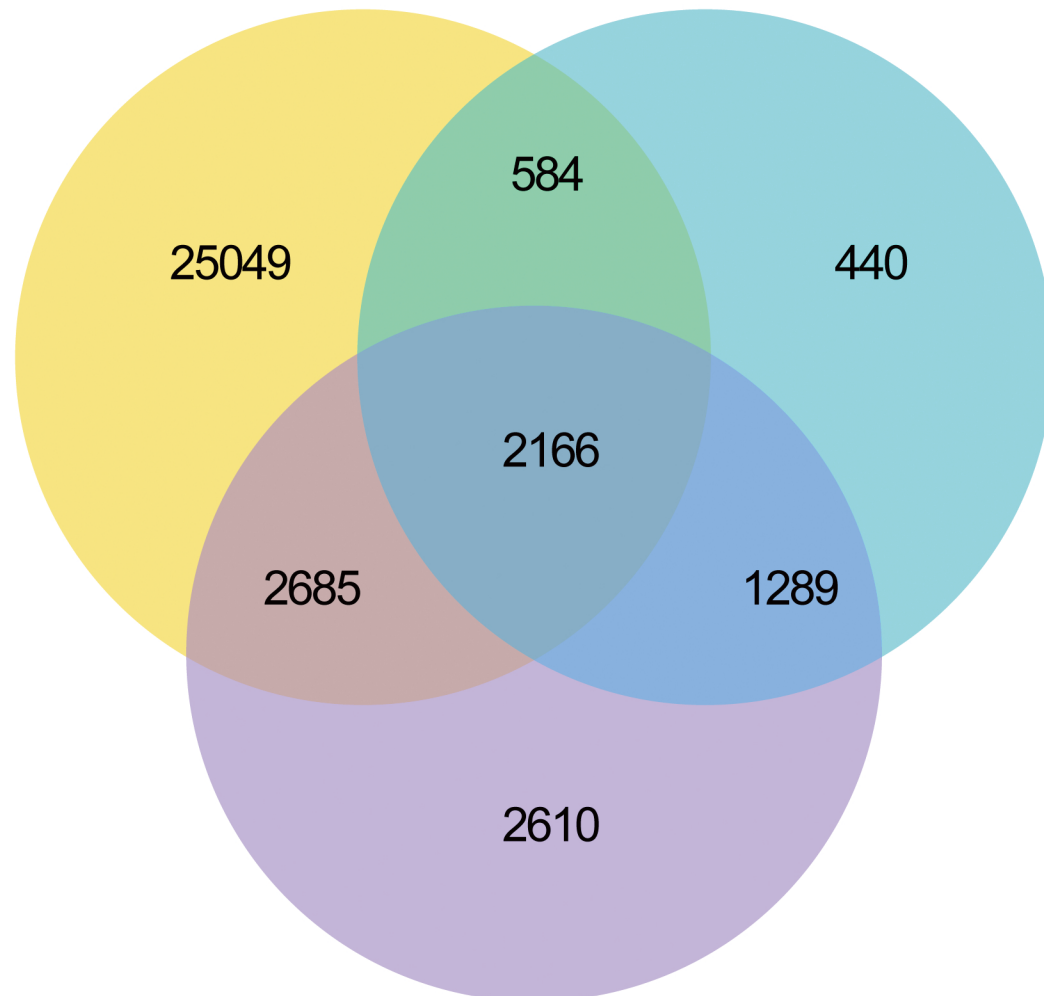

OAW vs. CON

## gastrula

OW vs. CON

OA vs. CON

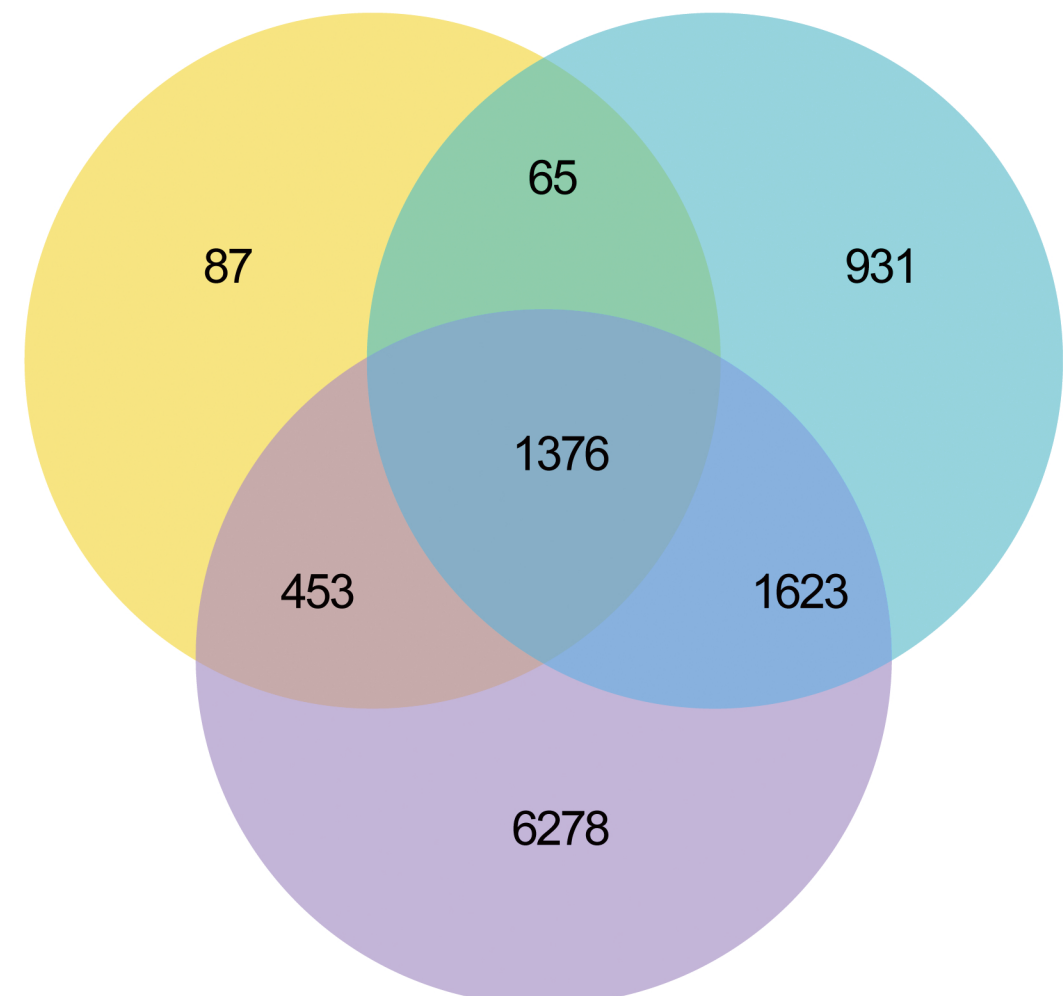

OAW vs. CON

## auricularia

OW vs. CON

OA vs. CON

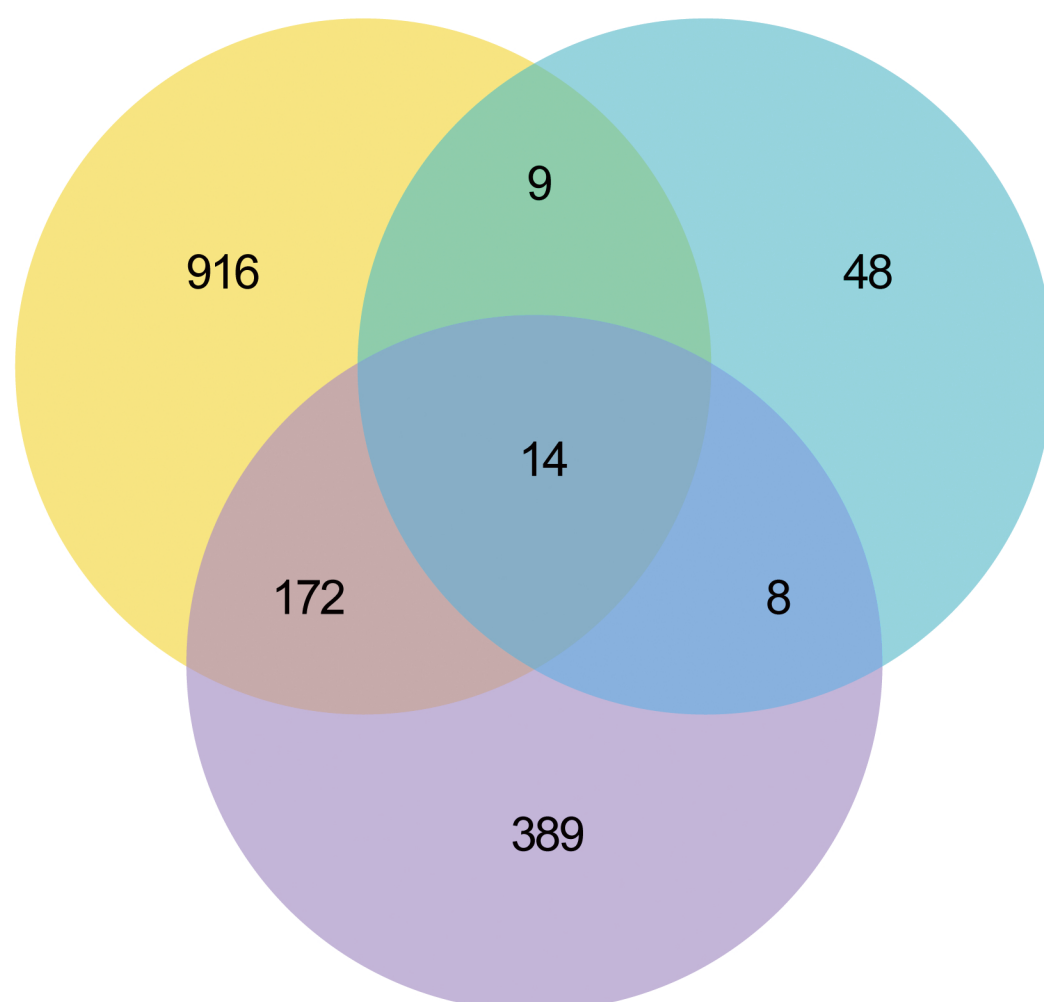

OAW vs. CON

## doliolaria

OW vs. CON

OA vs. CON

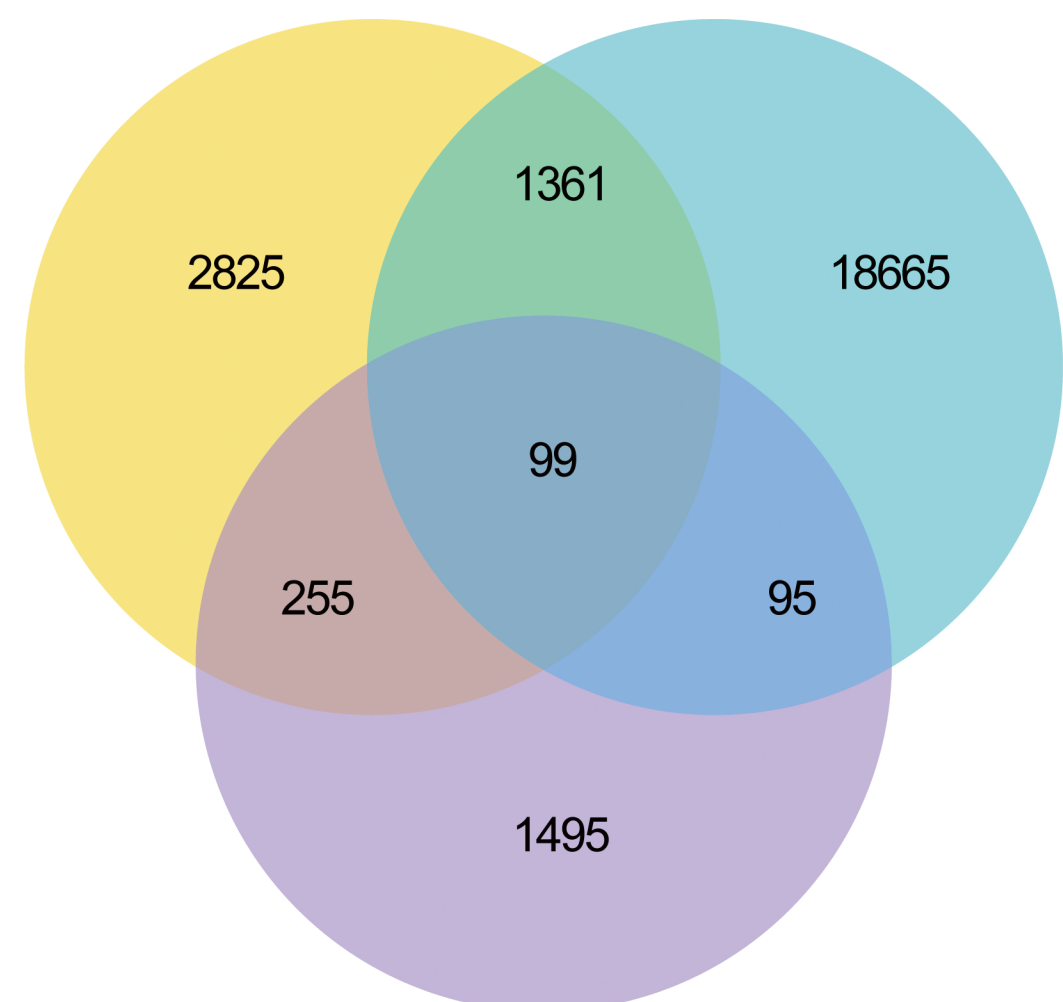

OAW vs. CON
