# Supplementary figures and images for: Transcriptomic Responses of a Lightly Calcified Echinoderm to Experimental Seawater Acidification and Warming during Early Development
Source: MDPI journal article supplement (doi:10.3390/biology12121520), 2023-12-13

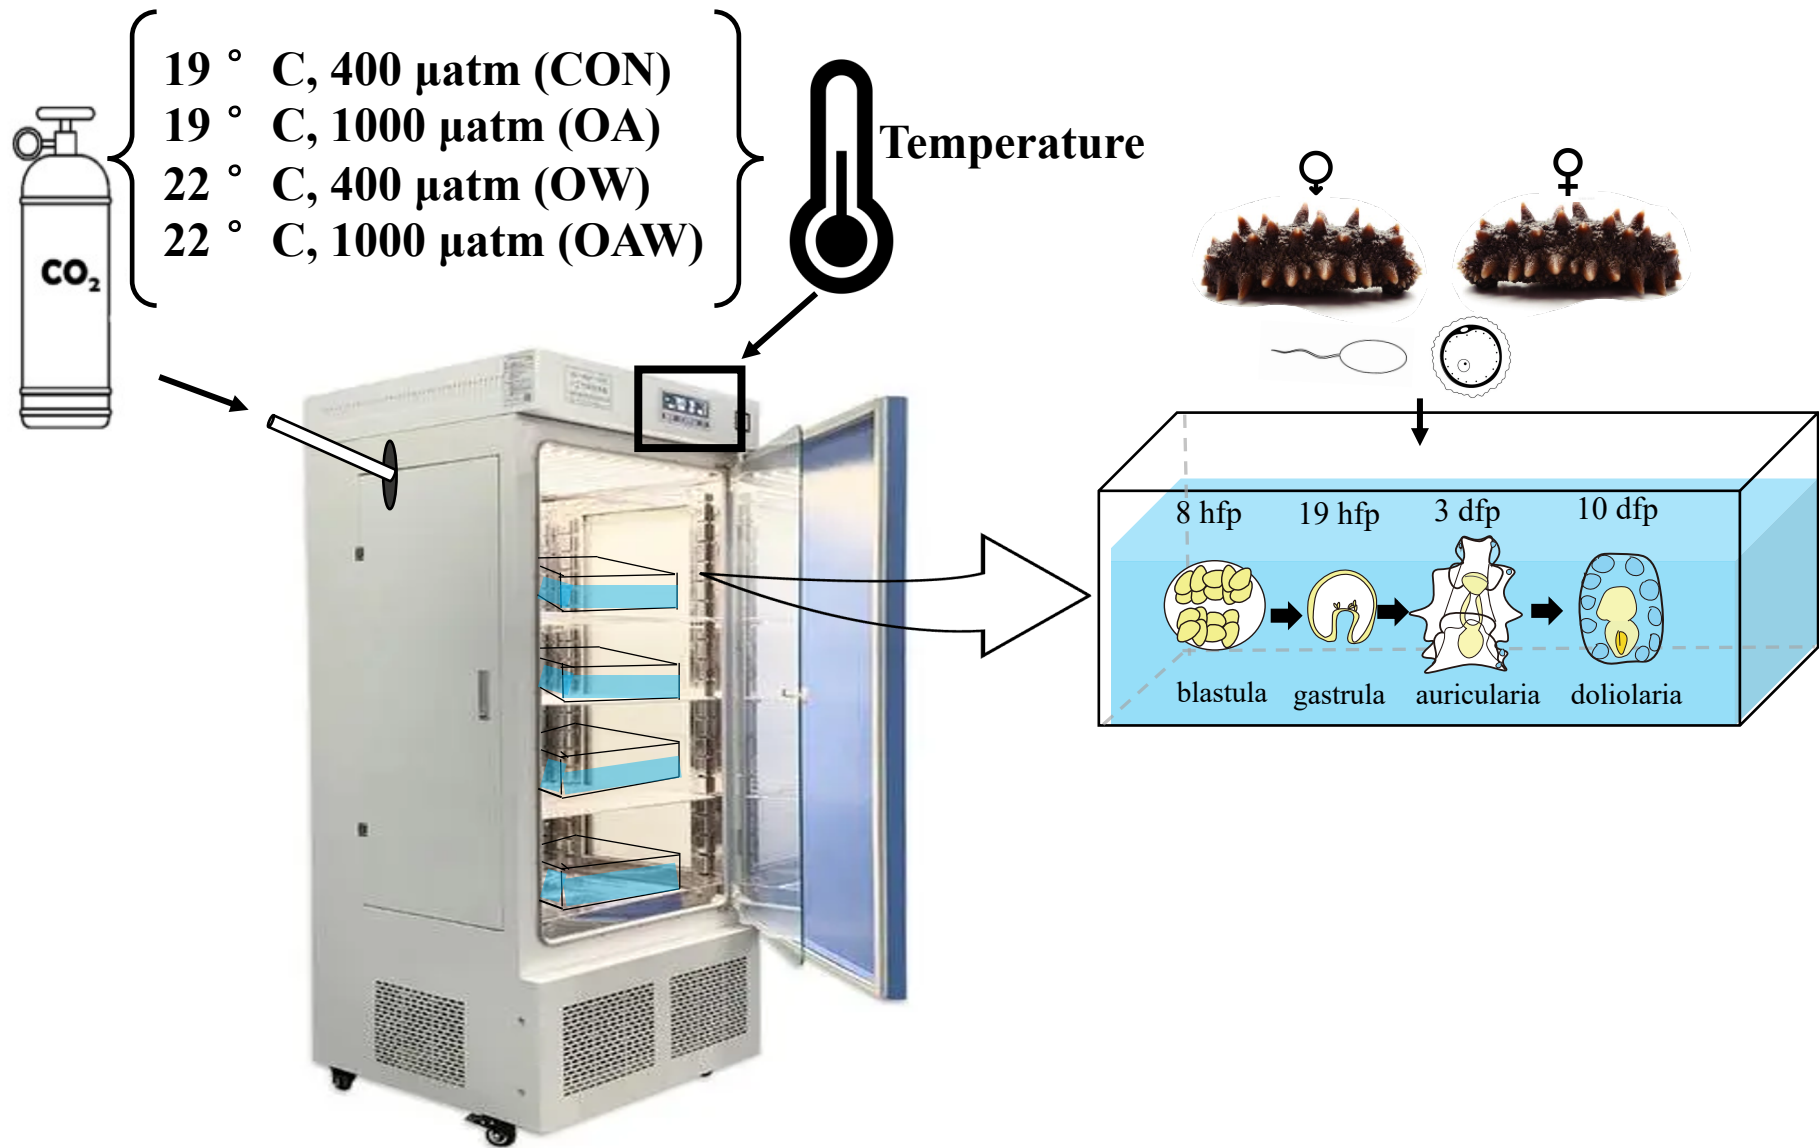

Supplement: s1 [file s1]
